# Supplementary material for: Poly(vinylpyrrolidone) stabilized aluminum nanoparticles obtained by the reaction of SiCl4 with LiAlH4
Source: Royal Society of Chemistry journal article supplement (doi:10.1039/c5nj00438a), 2015-01-01
Supplement: c5nj00438a1.pdf [file c5nj00438a1.pdf]

## Poly(vinylpyrrolidone) stabilized aluminium nanoparticles obtained from the reaction of $\text{SiCl}_4$ with $\text{LiAlH}_4$

Sanyasinaidu Gottapu,<sup>[a]</sup> Santanu Kumar Padhi,<sup>[b]</sup> Mamidipudi Ghanashyam Krishna,<sup>[b]</sup> and Krishnamurthi Muralidharan<sup>[\* a]</sup>

<sup>a</sup>School of chemistry, <sup>b</sup>School of Physics and Advanced Centre of Research in High Energy Materials (ACRHEM), University of Hyderabad, Gachibowli, Hyderabad, Telangana and India-500046.

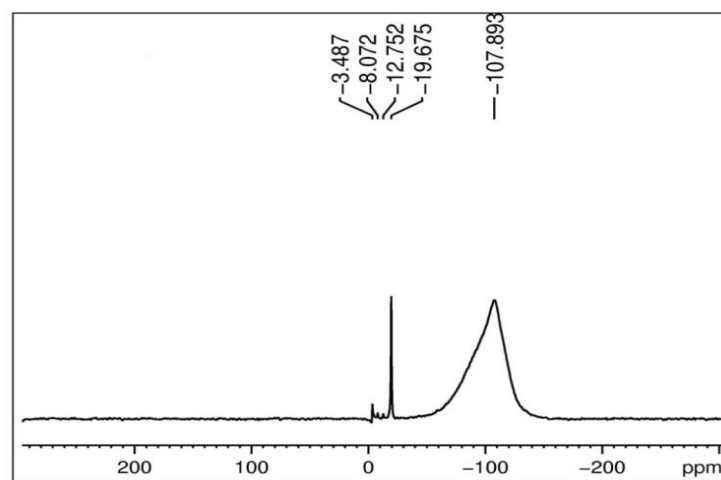

**Fig. S1**  $^{29}\text{Si}$  NMR spectrum of the reaction mixture (the peak at  $\delta$  -107.89 ppm is for glass)

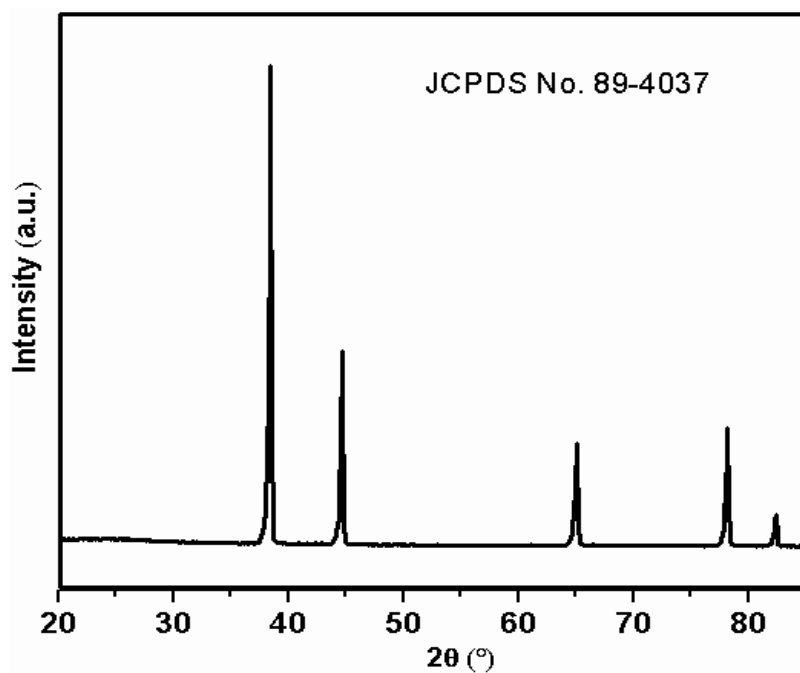

**Fig. S2** PXRD spectrum of aluminium without polymer

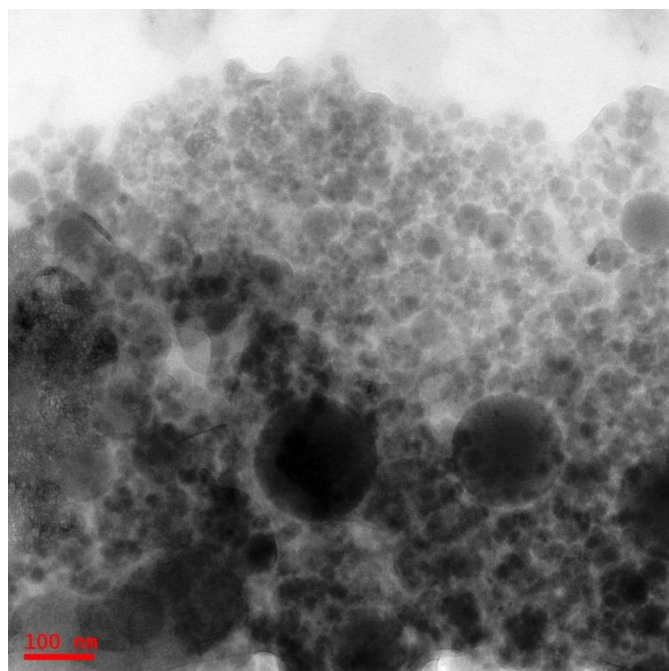

**Fig. S3** TEM image of aluminium without polymer

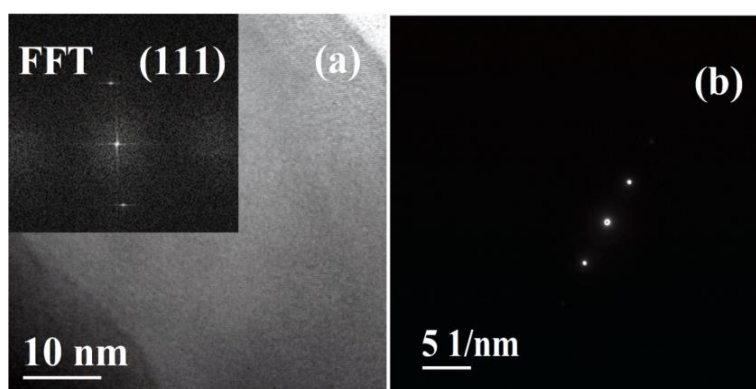

**Fig. S4:** (a) HRTEM image of bare Al with inset FFT and (b) Corresponding SAED pattern.

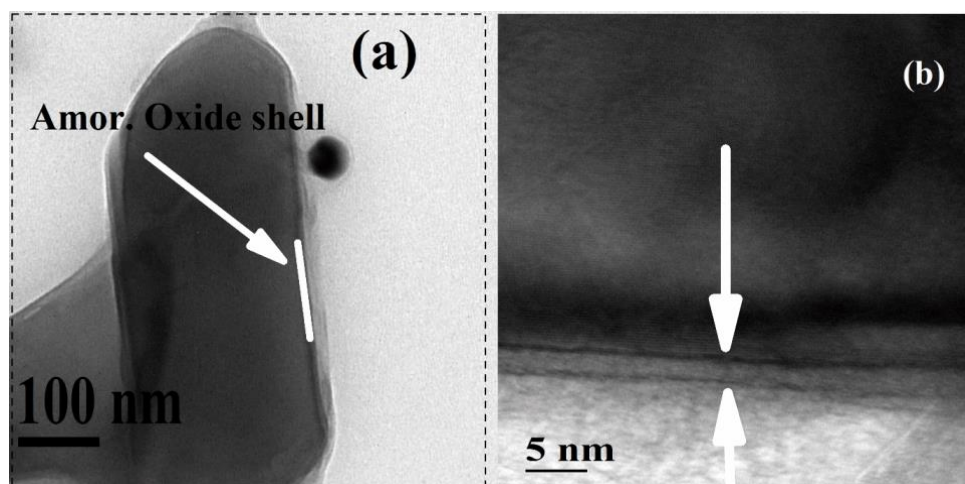

**Fig. S5:** Bright field TEM images of bare Al particles (a) showing oxide layer on the surface and (b) Corresponding HRTEM.

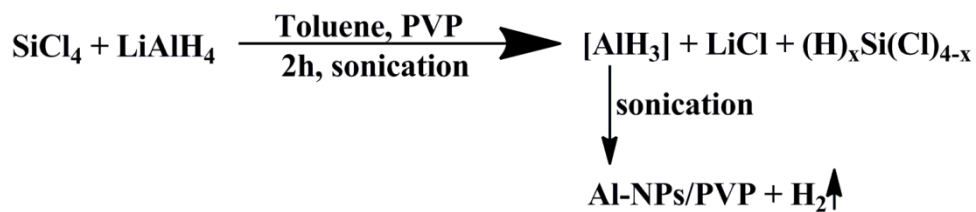

Fig.S6: Mechanism of formation of Al-PVP nanocomposite

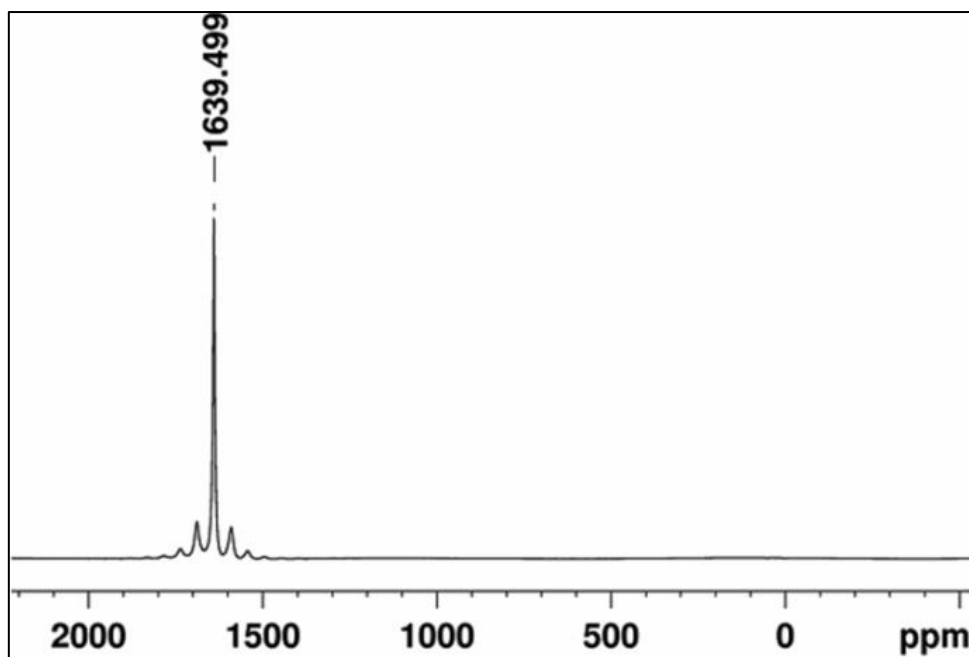Fig. S7  $^{27}\text{Al}$  MAS NMR spectra of Al-PVP nanocomposite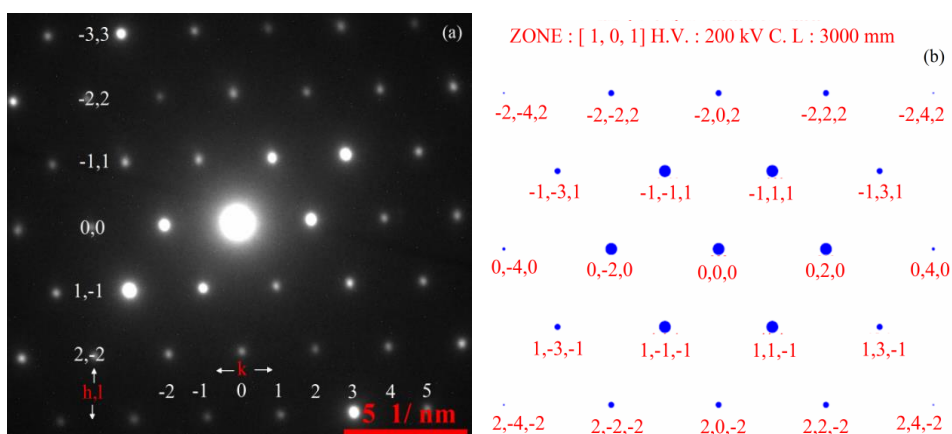Fig. S8. (a) Selected area electron diffraction pattern of Al-PVP composite nanocrystal indexed based on (b) Al simulated diffraction pattern using Web-based Electron Microscopy application software: web-EMAPS.<sup>1</sup>

1. J. M. Zuo, J. C. Mabon and Web-based Electron Microscopy Application Software: Web-EMAPS, Microsc Microanal 10(Suppl 2), 2004.

Available online: <http://emaps.mrl.uiuc.edu/>

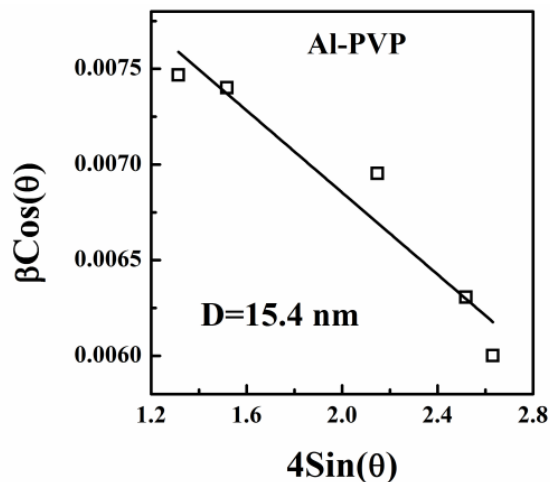

Fig. S9 Computed Williamson-Hall plot of Al-PVP composite

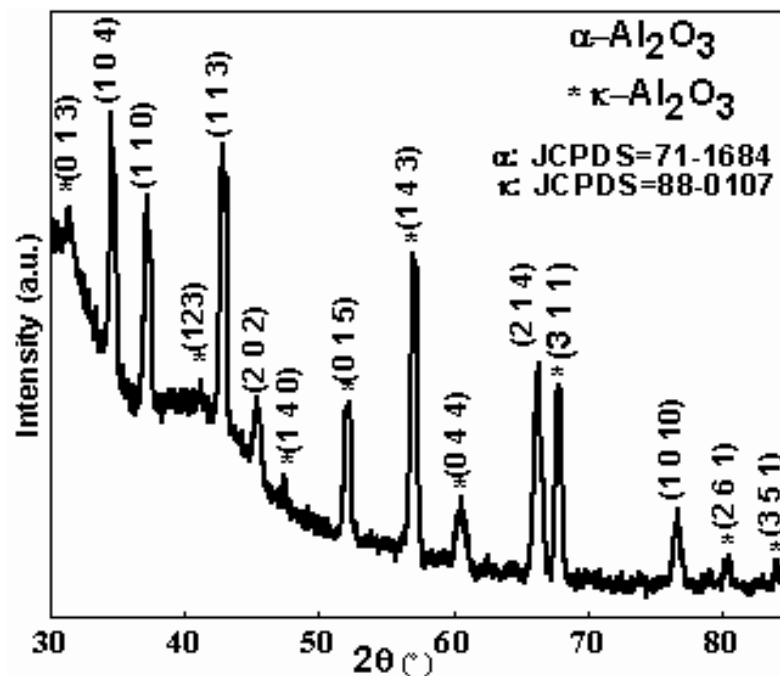

Fig. S10: PXRD pattern of Al-PVP nanocomposite obtained after thermal analysis revealing the growth of alumina phases.

**OXIDATION OF ALUMINIUM NANOPARTICLES**

When aluminium nanoparticle reacting with oxygen it will form  $\text{Al}_2\text{O}_3$  and increases mass of aluminium. (L.Chen, W. Song, J. Lv, X. Chen and C. Xie, Materials Chemistry and Physics, 2010, 120, 670-675. )

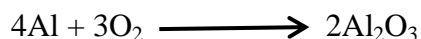

Liang Chen et.al calculated active aluminium in aluminium nanoparticles by using the equation below

$$m_{\text{Al}} = \frac{4}{3} \times \frac{M_{\text{Al}}}{M_{\text{O}_2}} m_{\text{O}_2} = 1.125 m_{\text{O}_2}$$

$m_{\text{Al}}$  = mass of the aluminium nanoparticles reacted in oxidation

$M_{\text{Al}}$  = formula weight of Al

$M_{\text{O}_2}$  = formula weight of  $\text{O}_2$

$m_{\text{O}_2} = \Delta m$  (mass gain form TG),  $m_{\text{O}_2}$  = mass of the reacted  $\text{O}_2$

Accordingly, since we have seen 56.03 % weight gain in TG it will give active Al as 63.03 %

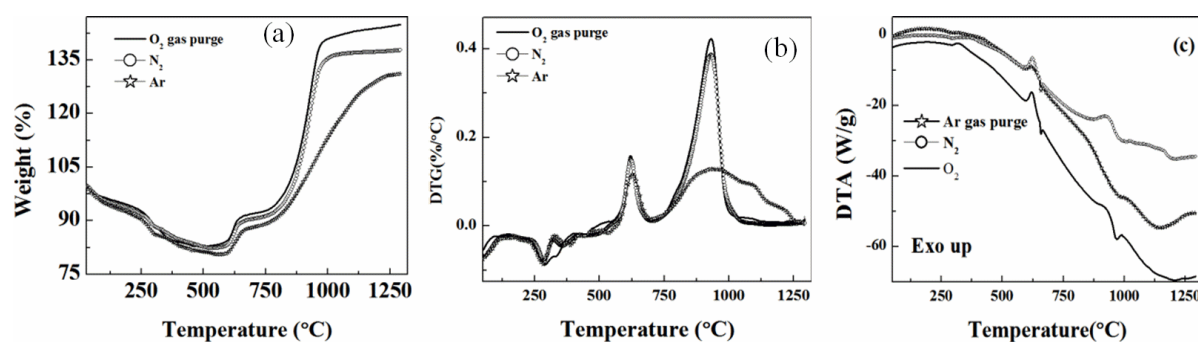

**Fig. S11:** TG-DTG-DTA plots of Al-PVP composite showing two stage of oxidation (experiment under oxygen, nitrogen and argon)

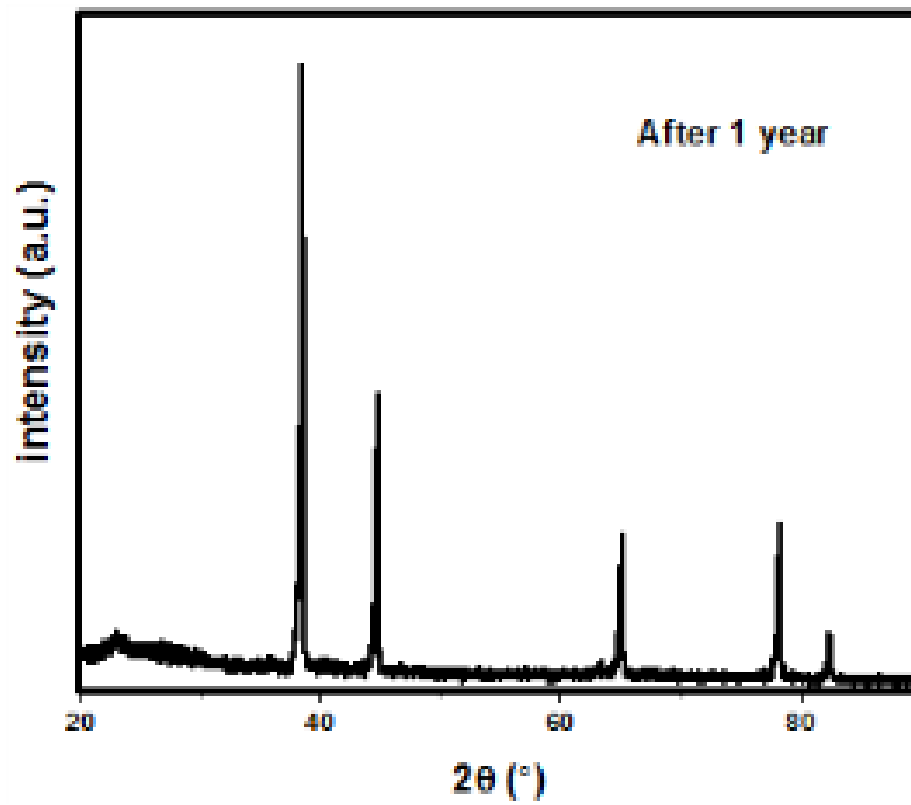

Fig. S12: PXRD spectrum of Al-PVP composite after one year.
